# Supplementary material
Source: Springer Nature journal article supplement (https://www.springermedizin.de/resource/supplementary/12936_2011_1715_MOESM1_ESM.pdf/9541554)

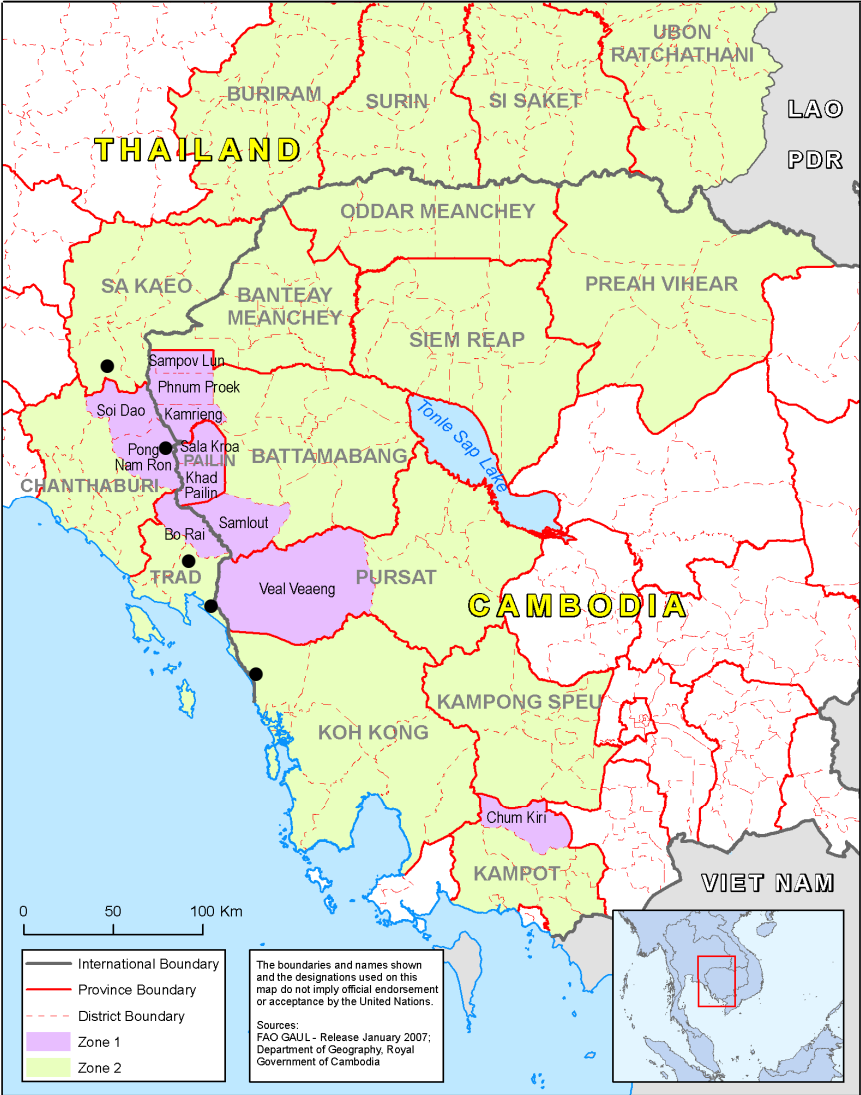

**THAILAND**

UBON RATCHATHANI

BURIRAM

SURIN

SI SAKET

LAO

PDR

ODDAR MEANCHHEY

SA KAEO

BANTEAY MEANCHHEY

PREAH VIHEAR

SIEM REAP

Sampov Lun

Phnum Proek

Soi Dao

Kamrieng

Pong Nam Ron

Sala Krba

PAILIN

Khad Pailin

BATTAMABANG

Tonle Sap Lake

CHANTHABURI

Bo Rai

Samlout

TRAD

Veal Veang

PURSAT

**CAMBODIA**

KAMPONG SPEU

KOH KONG

Chum Kiri

KAMPOT

VIET NAM

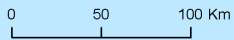

- International Boundary
- Province Boundary
- - - District Boundary
- Zone 1
- Zone 2

The boundaries and names shown and the designations used on this map do not imply official endorsement or acceptance by the United Nations.

Sources:  
 FAO GAUL - Release January 2007;  
 Department of Geography, Royal Government of Cambodia

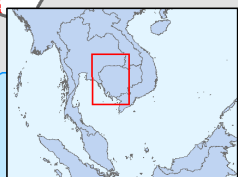

Supplement: MOESM1 [file 9541554]
